# Supplementary material for: Impact of mineral dust on the global nitrate aerosol direct and indirect radiative effect
Source: Copernicus journal article supplement (doi:10.5194/acp-25-1333-2025), 2025-01-31
Supplement: Supplementary file 1 [file acp-25-1333-2025-supplement.pdf]

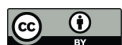

*Supplement of*

## **Impact of mineral dust on the global nitrate aerosol direct and indirect radiative effect**

**Alexandros Milouisis et al.**

*Correspondence to:* Vlassis A. Karydis (v.karydis@fz-juelich.de)

The copyright of individual parts of the supplement might differ from the article licence.

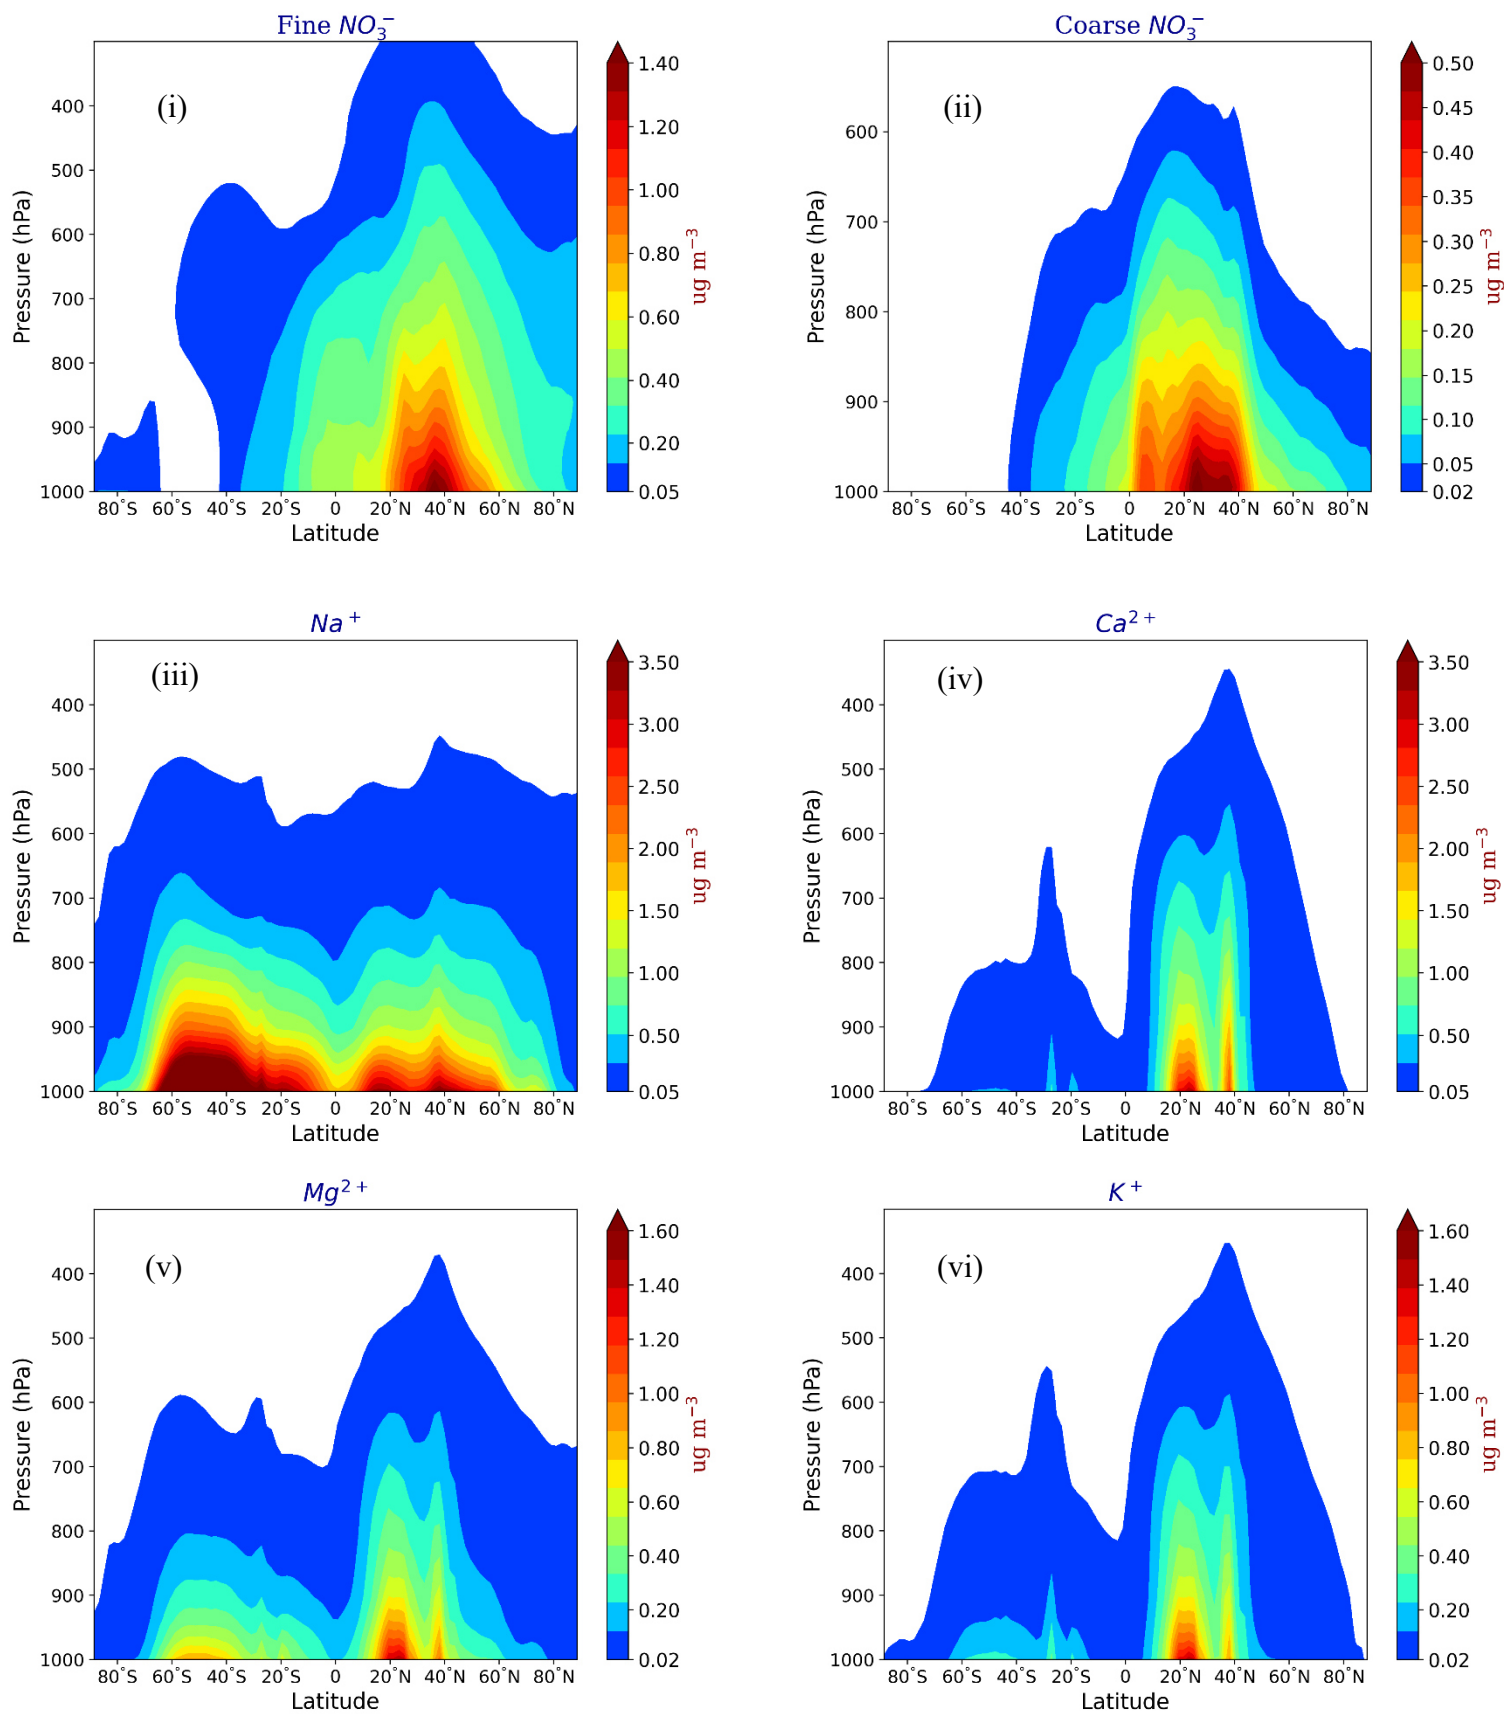

**Figure S1 :** Time averaged zonal concentrations of i) fine and ii) coarse aerosol  $\text{NO}_3^-$ , iii)  $\text{Na}^+$ , iv)  $\text{Ca}^{2+}$ , v)  $\text{Mg}^{2+}$  and vi)  $\text{K}^+$  in TSP as predicted by EMAC from the Base Case simulation.

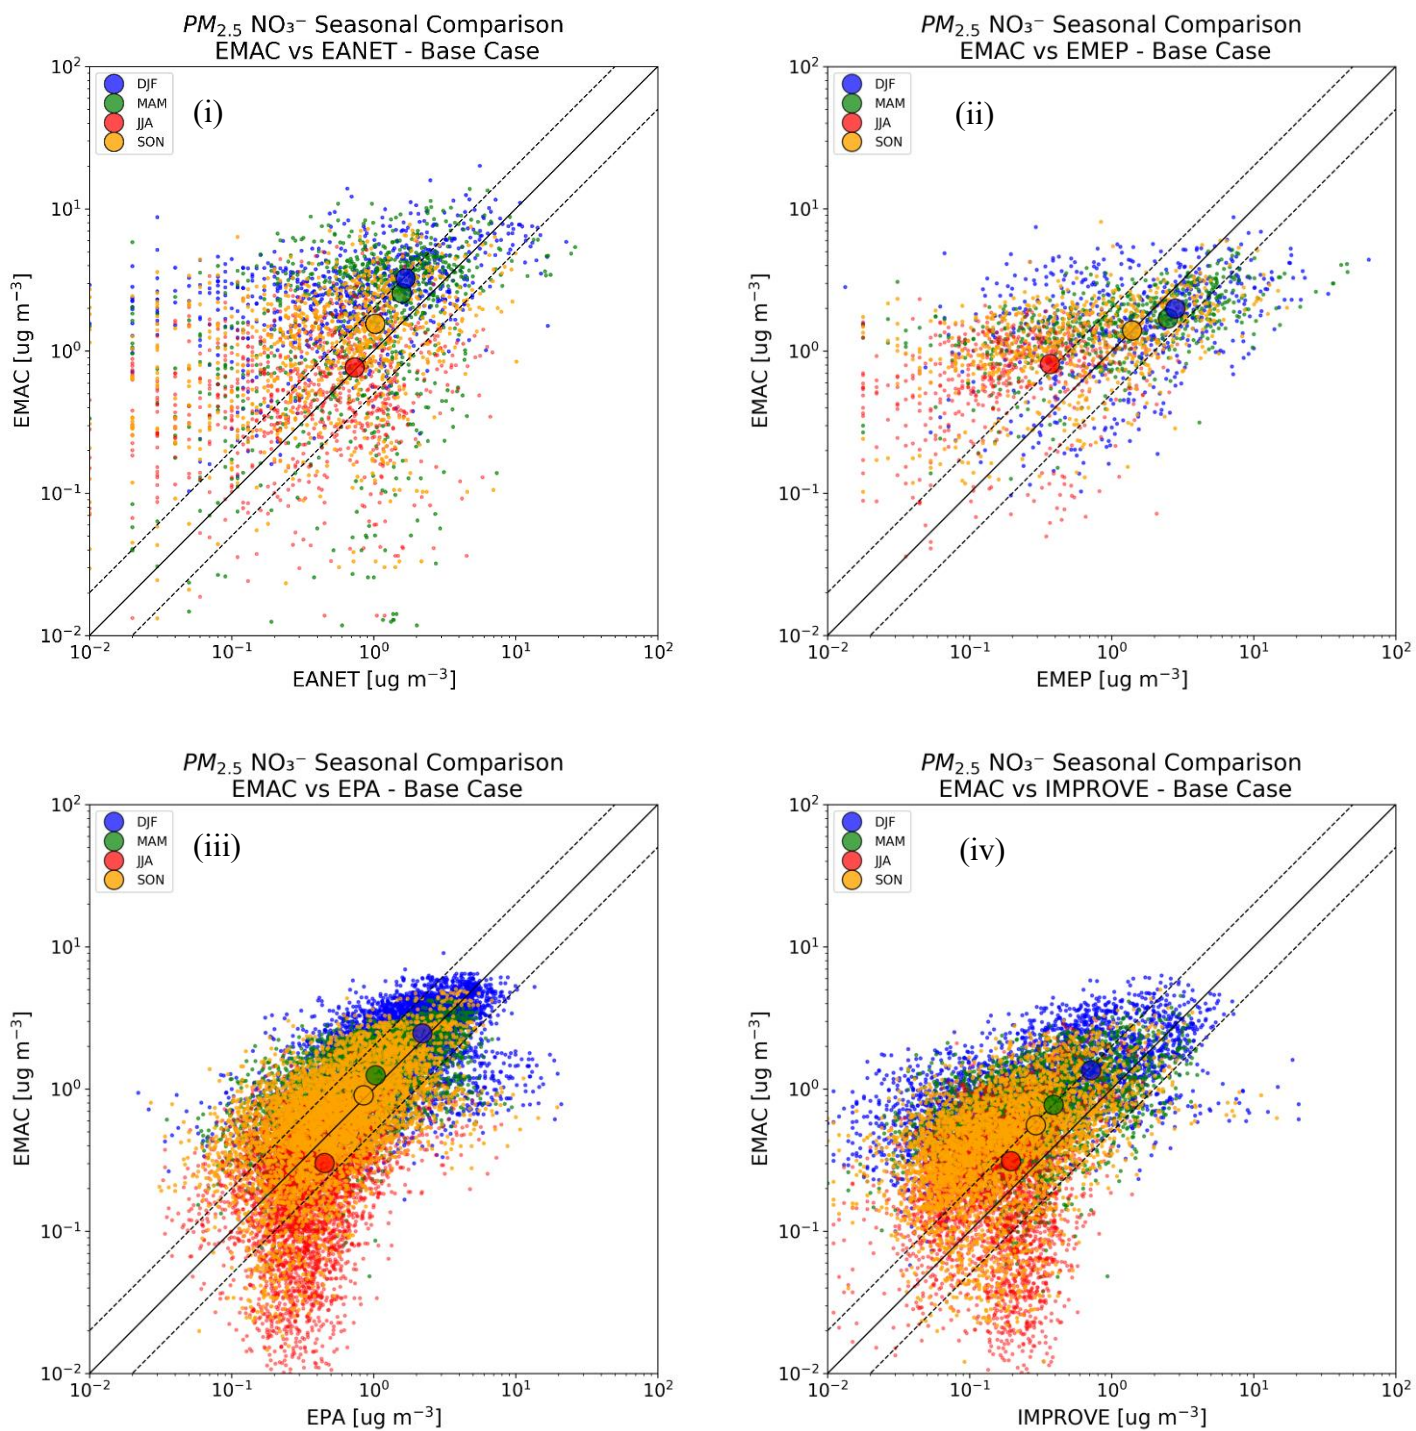

**Figure S2:** Scatterplots comparing the seasonal mean surface mass concentrations of  $PM_{2.5} NO_3^-$  as simulated by EMAC from the Base Case simulation with observations from the networks of (i) EANET, (ii) EMEP, (iii) EPA and (iv) IMPROVE. Blue points indicate values in winter, green points in spring, red points in summer and yellow points in autumn. Enlarged dots indicate seasonal means. Also shown are the 1:1, 2:1, and 1:2 lines.

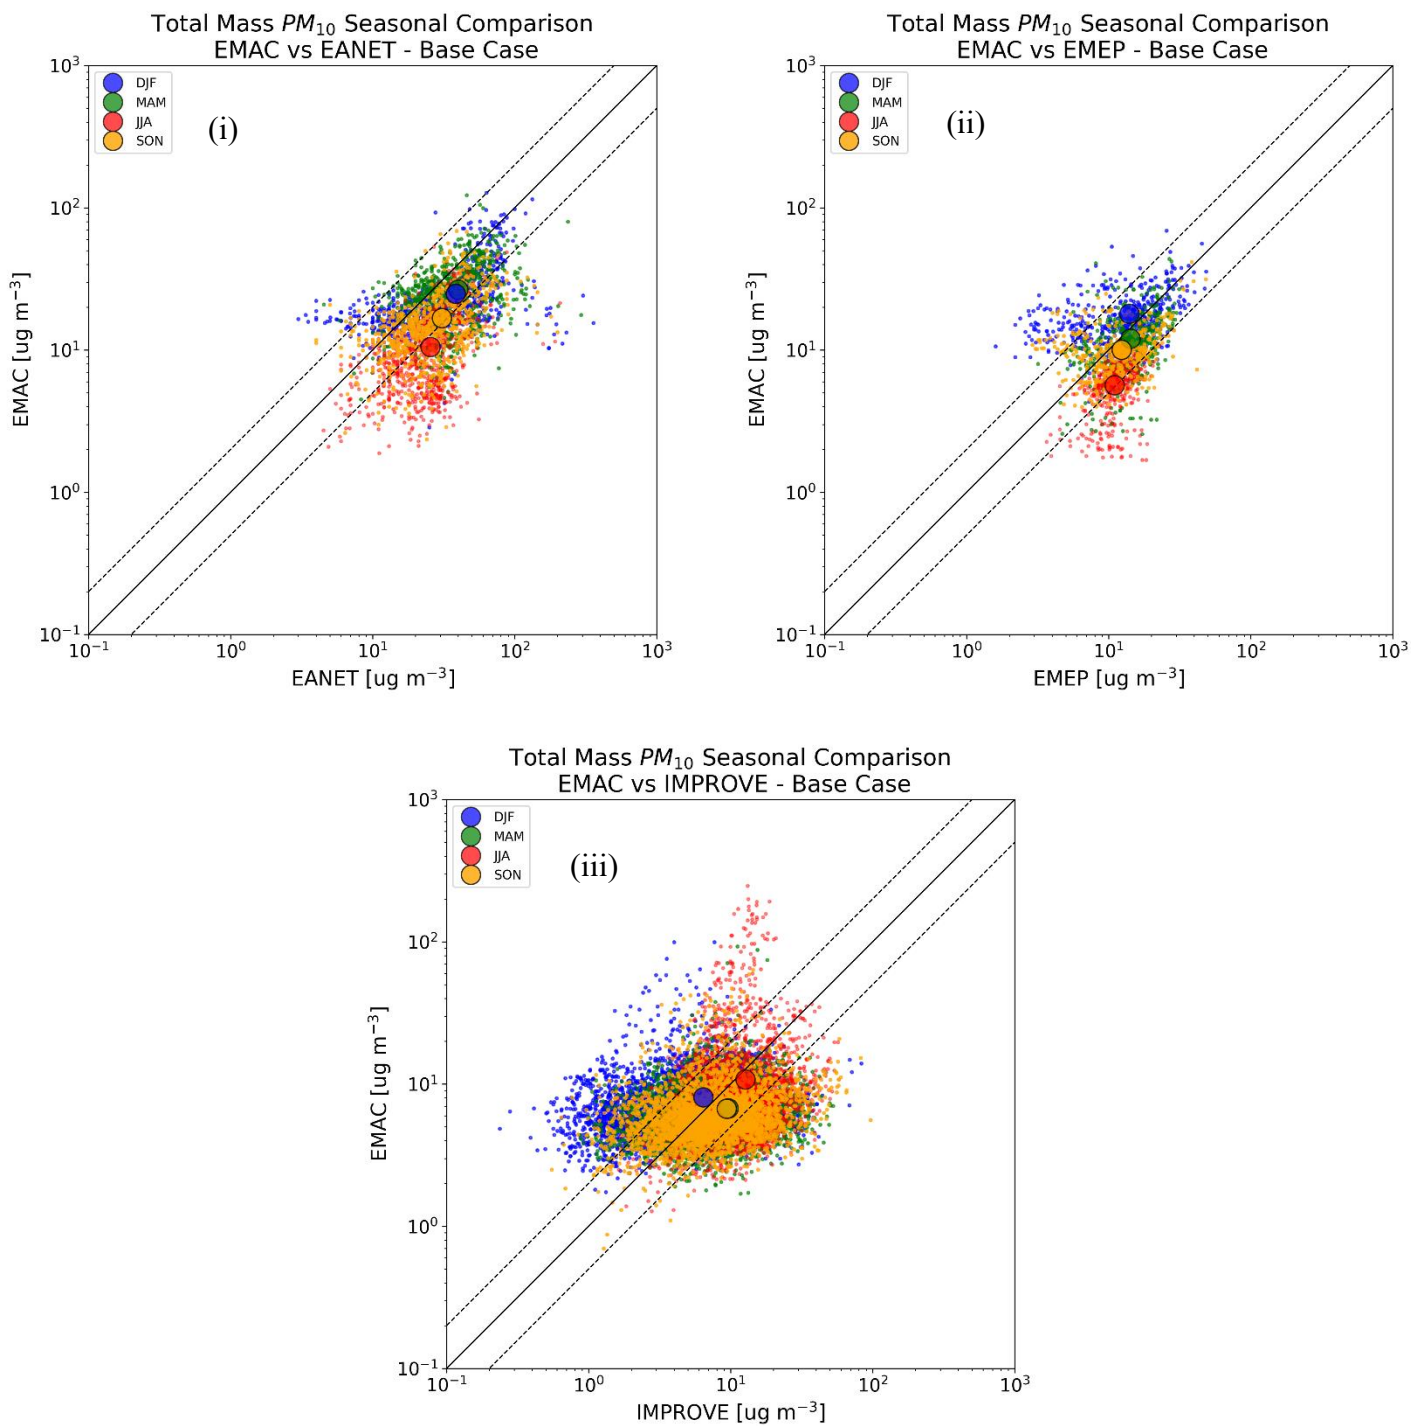

**Figure S3:** Scatterplots comparing the seasonal mean surface mass concentrations of  $PM_{10}$  aerosols as simulated by EMAC from the Base Case simulation with observations from the networks of (i) EANET, (ii) EMEP and (iii) IMPROVE. Blue points indicate values in winter, green points in spring, red points in summer and yellow points in autumn. Enlarged dots indicate seasonal means. Also shown are the 1:1, 2:1, and 1:2 lines.

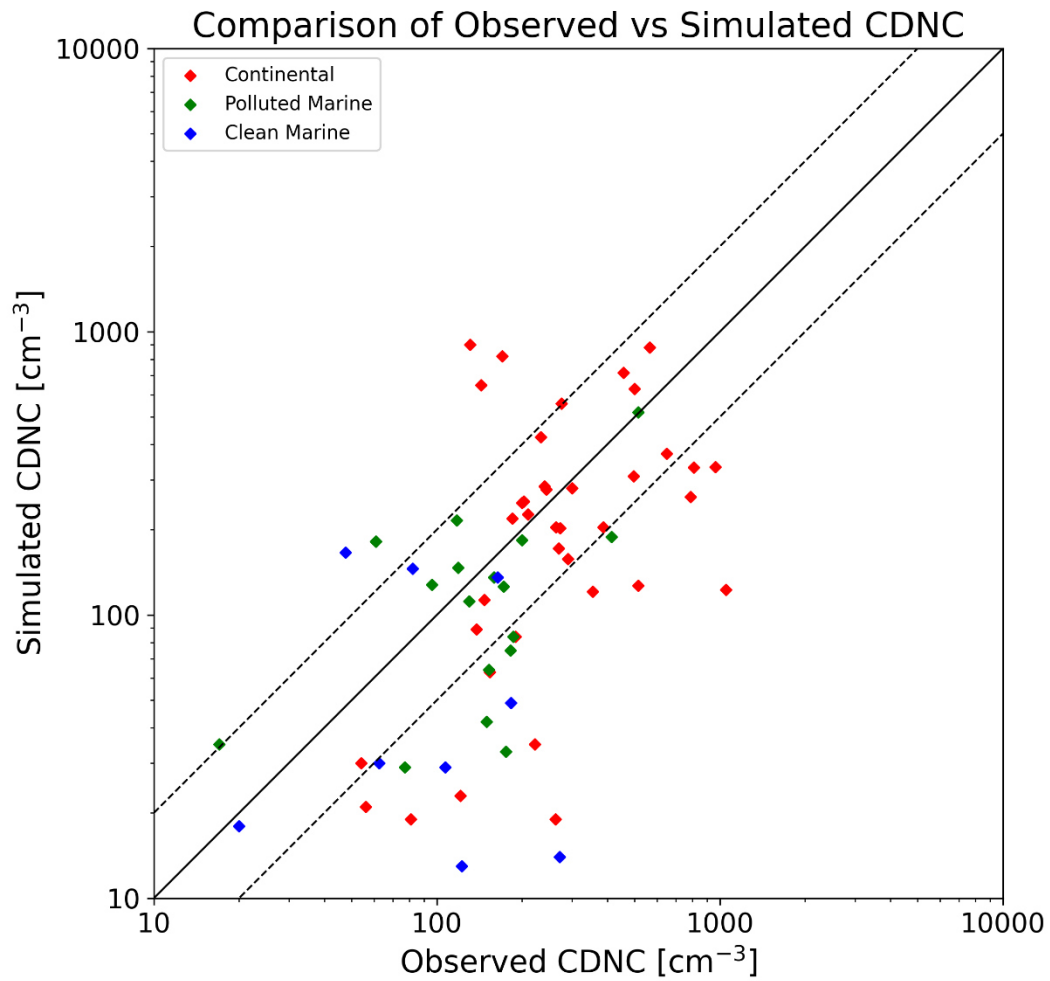

**Figure S4:** Comparison of global cloud droplet number concentrations as simulated by EMAC from the Base Case simulation and observed across different types of environments (continental, polluted and clean marine). The exact locations, altitudes and time periods of the measurements are shown in Table S3. Also shown are the 1:1, 2:1, and 1:2 lines.

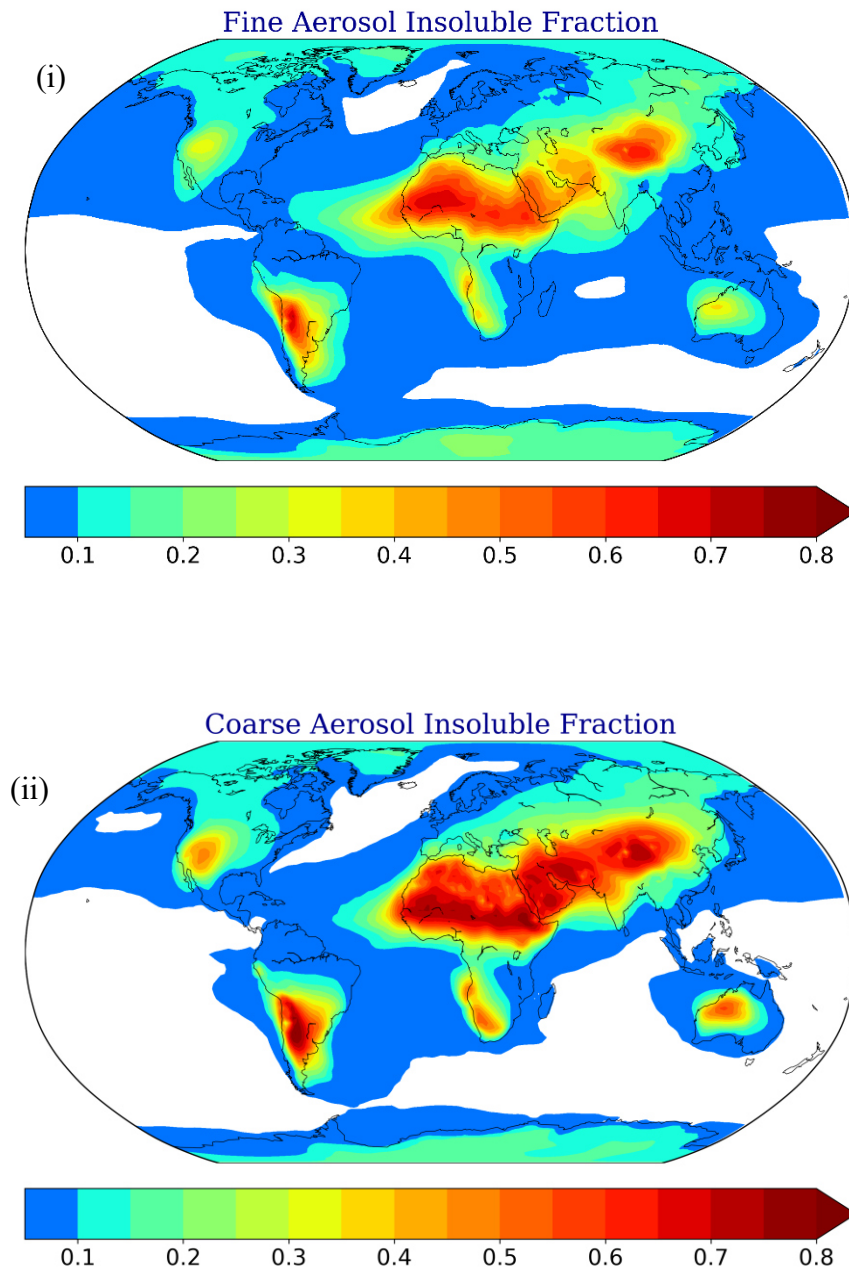

**Figure S5 :** Global mean insoluble fraction of (i) fine and (ii) coarse aerosols as predicted by EMAC from the Base Case simulation.

**Table S1:** Seasonal statistical evaluation of the EMAC predicted surface mass concentrations of PM<sub>2.5</sub> NO<sub>3</sub><sup>-</sup> from the Base Case simulation against observations for the period 2008 - 2018.

| Network | Season | Number of datasets | Mean Observed (µg m <sup>-3</sup> ) | Mean Predicted (µg m <sup>-3</sup> ) | MAGE (µg m <sup>-3</sup> ) | MB (µg m <sup>-3</sup> ) | NME (%) | NMB (%) | RMSE (µg m <sup>-3</sup> ) |
|---------|--------|--------------------|-------------------------------------|--------------------------------------|----------------------------|--------------------------|---------|---------|----------------------------|
| EPA     | Winter | 144                | 2.86                                | 2.93                                 | 1.43                       | 0.07                     | 49.83   | 2.39    | 2.09                       |
|         | Spring | 291                | 1.63                                | 1.78                                 | 0.71                       | 0.14                     | 43.54   | 8.84    | 1.09                       |
|         | Summer | 280                | 0.69                                | 0.31                                 | 0.41                       | -0.38                    | 59.5    | -54.87  | 0.8                        |
|         | Autumn | 290                | 0.79                                | 0.63                                 | 0.37                       | -0.16                    | 46.88   | -19.66  | 0.62                       |
| IMPROVE | Winter | 116                | 0.92                                | 1.52                                 | 1.03                       | 0.6                      | 111.16  | 64.6    | 1.48                       |
|         | Spring | 233                | 0.61                                | 1.0                                  | 0.59                       | 0.39                     | 97.73   | 64.09   | 0.81                       |
|         | Summer | 193                | 0.24                                | 0.37                                 | 0.26                       | 0.13                     | 107.85  | 52.94   | 0.39                       |
|         | Autumn | 214                | 0.26                                | 0.44                                 | 0.29                       | 0.18                     | 111.35  | 67.43   | 0.44                       |
| EMEP    | Winter | 7                  | 2.61                                | 1.92                                 | 1.47                       | -0.68                    | 56.4    | -26.19  | 2.2                        |
|         | Spring | 18                 | 1.99                                | 1.72                                 | 0.69                       | -0.27                    | 34.75   | -13.47  | 1.05                       |
|         | Summer | 18                 | 0.68                                | 0.69                                 | 0.43                       | 0.01                     | 62.25   | 1.23    | 0.5                        |
|         | Autumn | 17                 | 1.55                                | 1.15                                 | 0.61                       | -0.4                     | 39.12   | -25.94  | 0.97                       |
| EANET   | Winter | 30                 | 2.11                                | 2.95                                 | 2.11                       | 0.84                     | 100.11  | 39.91   | 2.86                       |
|         | Spring | 59                 | 1.74                                | 2.67                                 | 1.84                       | 0.92                     | 105.65  | 53.04   | 2.8                        |
|         | Summer | 59                 | 0.68                                | 0.7                                  | 0.72                       | 0.02                     | 105.87  | 2.38    | 1.09                       |
|         | Autumn | 59                 | 0.77                                | 1.11                                 | 0.77                       | 0.34                     | 99.97   | 43.4    | 1.12                       |

**Table S2:** Seasonal statistical evaluation of EMAC predicted PM<sub>10</sub> aerosol surface mass concentrations from the Base Case simulation against observations for the period 2008 – 2018.

| Network | Season | Number of datasets | Mean Observed ( $\mu\text{g m}^{-3}$ ) | Mean Predicted ( $\mu\text{g m}^{-3}$ ) | MAGE ( $\mu\text{g m}^{-3}$ ) | MB ( $\mu\text{g m}^{-3}$ ) | NME (%) | NMB (%) | RMSE ( $\mu\text{g m}^{-3}$ ) |
|---------|--------|--------------------|----------------------------------------|-----------------------------------------|-------------------------------|-----------------------------|---------|---------|-------------------------------|
| IMPROVE | Winter | 89                 | 7.16                                   | 8.36                                    | 4.94                          | 1.2                         | 68.9    | 16.74   | 6.96                          |
|         | Spring | 222                | 10.8                                   | 7.89                                    | 5.48                          | -2.91                       | 50.77   | -26.92  | 8.64                          |
|         | Summer | 203                | 14.27                                  | 12.85                                   | 10.88                         | -1.42                       | 76.22   | -9.98   | 18.24                         |
|         | Autumn | 207                | 10.61                                  | 6.79                                    | 5.45                          | -3.82                       | 51.33   | -35.98  | 8.67                          |
| EMEP    | Winter | 17                 | 15.2                                   | 13.4                                    | 6.46                          | -1.8                        | 42.48   | -11.84  | 7.88                          |
|         | Spring | 34                 | 12.23                                  | 10.36                                   | 3.8                           | -1.86                       | 31.06   | -15.23  | 4.98                          |
|         | Summer | 35                 | 12.74                                  | 4.92                                    | 7.82                          | -7.82                       | 61.35   | -61.35  | 8.74                          |
|         | Autumn | 36                 | 13.78                                  | 8.91                                    | 5.13                          | -4.87                       | 37.21   | -35.31  | 6.22                          |
| EANET   | Winter | 20                 | 38.98                                  | 21.49                                   | 19.48                         | -17.49                      | 49.98   | -44.87  | 31.46                         |
|         | Spring | 42                 | 44.52                                  | 25.96                                   | 20.19                         | -18.56                      | 45.35   | -41.69  | 27.79                         |
|         | Summer | 41                 | 27.94                                  | 9.38                                    | 18.56                         | -18.56                      | 66.43   | -66.43  | 22.73                         |
|         | Autumn | 42                 | 30.43                                  | 13.23                                   | 17.32                         | -17.2                       | 56.91   | -56.52  | 21.52                         |



**Table S3:** Comparison between cloud droplet number concentrations calculated by the Base Case simulation and global observations (Karydis et al., 2017 and references therein).

| Location          | Latitude  | Longitude | Altitude   | Time Period | Observed CDNC( $\text{cm}^{-3}$ ) | Simulated CDNC( $\text{cm}^{-3}$ ) |
|-------------------|-----------|-----------|------------|-------------|-----------------------------------|------------------------------------|
| S. Pacific Ocean  | 20–35°S   | 135–175°W | PBL        | Annual      | 82                                | 146                                |
| E. Pacific Ocean  | 29–32°N   | 120–123°W | 450–850 m  | July        | 49–279                            | 136                                |
| N. Pacific Ocean  | 41°N      | 131°W     | < 1500 m   | April       | 21–74                             | 166                                |
| W. Canary Islands | 32°N      | 25°W      | PBL        | July        | 17                                | 35                                 |
| W. Australia      | 30–40°S   | 88–103°E  | PBL        | Annual      | 107                               | 29                                 |
| Beaufort Sea      | 72–78°N   | 154–159°W | 202–1017 m | June        | 178–365                           | 14                                 |
| Beaufort Sea      | 70.5–73°N | 145–147°W | 300–3000 m | June        | 20–225                            | 13                                 |
| Beaufort Sea      | 65–75°N   | 130–170°W | 400–4600 m | April       | 48–77                             | 30                                 |
| NE. Alaska Coast  | 69–71°N   | 150–158°W | 400–4000 m | October     | 10–30                             | 18                                 |
| Yellow Sea        | 28–31°N   | 127–131°E | PBL        | Annual      | 30–1000                           | 520                                |
| SE Asia Coast     | 10–40°N   | 105–150°E | PBL        | Annual      | 186<br>(100–250)                  | 84                                 |
| N. American Coast | 15–35°N   | 115–140°W | PBL        | Annual      | 159<br>(150–300)                  | 136                                |
| S. American Coast | 8–28°S    | 70–90°W   | PBL        | Annual      | 182<br>(100–300)                  | 75                                 |

|                         |           |           |            |                  |                  |     |
|-------------------------|-----------|-----------|------------|------------------|------------------|-----|
| S. African Coast        | 5–25°S    | 10–15°E   | PBL        | Annual           | 153<br>(130–300) | 64  |
| NE. Atlantic Ocean      | 50–55°N   | 25–30°W   | 800–2200 m | April            | 65–300           | 49  |
| Santa Maria, Azores     | 37°N      | 25°W      | 550–1000 m | June             | 150<br>(74–192)  | 42  |
| Canary Islands Vicinity | 28°N      | 16.5°W    | PBL        | June – July      | 51–300           | 33  |
| W. Moroccan Coast       | 34°N      | 11°W      | PBL        | July             | 77               | 29  |
| Oregon Coast            | 45.5°N    | 124.5°W   | PBL        | August           | 25–210           | 216 |
| Key West, FL            | 24.5°N    | 82°W      | PBL        | July             | 268–560          | 189 |
| Fundy Bay, Nova Scotia  | 44°N      | 66°W      | 20–290 m   | August           | 61 (59–97)       | 182 |
| Cornwall Coast          | 50°N      | 5.5°W     | 450–800 m  | February         | 130              | 112 |
| British Isles, UK       | 55°N      | 2.5°W     | Surface    | April            | 172              | 126 |
| British Isles, UK       | 51°N      | 6°W       | Surface    | October          | 119              | 147 |
| British Isles, UK       | 53°N      | 9.5°W     | Surface    | December         | 96               | 128 |
| SE. England Coast       | 51.5–52°N | 1.5–2.5°E | 380–750 m  | September        | 151–249          | 184 |
| SW. Indian Coast        | 10°N      | 65–75°E   | 50–550 m   | February – March | 100–500          | 280 |
| Qinghai Province        | 34–37°N   | 98–103°E  | PBL        | Annual           | 30–700           | 219 |

|                             |         |                    |                |                       |                 |     |
|-----------------------------|---------|--------------------|----------------|-----------------------|-----------------|-----|
| Beijing                     | 37–41°N | 113–120°E          | PBL            | Annual                | 30–1100         | 880 |
| NE. China                   | 39–40°N | 117.5 –<br>118.5°E | 1719–1931<br>m | April –<br>May        | 200–800         | 630 |
| Hebei<br>Province           | 35–40°N | 112–119°E          | PBL            | Annual                | 30–400          | 819 |
| Cumbria,<br>England         | 54.5°N  | 2.5°W              | Surface        | March –<br>April      | 100–2000        | 123 |
| Cumbria,<br>England         | 54.5°N  | 2.5°W              | Surface        | May                   | 482–549         | 127 |
| Koblenz,<br>Germany         | 50°N    | 7.5°E              | 901–914 hPa    | May                   | 675–900         | 261 |
| Koblenz,<br>Germany         | 50°N    | 7.5°E              | 945 hPa        | October               | 965             | 333 |
| N. Finland                  | 68°N    | 24°E               | 342–572 m      | Annual                | 154<br>(30–610) | 63  |
| N. Finland                  | 68°N    | 24°E               | 342–572 m      | October –<br>November | 55–470          | 19  |
| Kuopio,<br>Finland          | 62.5°N  | 27.5°E             | 306 m          | August –<br>November  | 138             | 89  |
| Cabauw,<br>Netherlands      | 51°N    | 4.5°E              | PBL            | May                   | 180–360         | 172 |
| Jungfrauoch,<br>Switzerland | 46.5°N  | 7.5°E              | Surface        | July –<br>August      | 112–416         | 204 |
| Barrow, AK                  | 71.5°N  | 156.5°W            | 389–830 m      | August                | 56              | 21  |
| Barrow, AK                  | 71.5°N  | 156.5°W            | 431–736 m      | May                   | 222             | 35  |
| Barrow, AK                  | 71.5°N  | 156.5°W            | 297–591 m      | June                  | 121             | 23  |

|                             |           |           |             |                           |                  |     |
|-----------------------------|-----------|-----------|-------------|---------------------------|------------------|-----|
| Barrow, AK                  | 71.5°N    | 156.5°W   | 393–762 m   | July                      | 54               | 30  |
| Barrow, AK                  | 71.5°N    | 156.5°W   | 1059–1608 m | September                 | 81               | 19  |
| Southern Great Plains, OK   | 36.5°N    | 97.5°W    | 795–1450 m  | Winter                    | 265–281          | 203 |
| Southern Great Plains, OK   | 36.5°N    | 97.5°W    | 343–1241 m  | Winter                    | 244              | 277 |
| Southern Great Plains, OK   | 36.5°N    | 97.5°W    | 985–1885 m  | Spring                    | 200–219          | 227 |
| Southern Great Plains, OK   | 36.5°N    | 97.5°W    | 671–1475 m  | Spring                    | 203              | 252 |
| Southern Great Plains, OK   | 36.5°N    | 97.5°W    | 1280–2200 m | Summer                    | 128–159          | 648 |
| Southern Great Plains, OK   | 36.5°N    | 97.5°W    | 756–1751 m  | Summer                    | 131              | 899 |
| Southern Great Plains, OK   | 36.5°N    | 97.5°W    | 1030–1770m  | Autumn                    | 217-249          | 425 |
| Southern Great Plains, OK   | 36.5°N    | 97.5°W    | 404–1183 m  | Autumn                    | 276              | 557 |
| Southern Great Plains, OK   | 36.5°N    | 97.5°W    | 900–800 hPa | March                     | 200<br>(100–320) | 249 |
| Southern Great Plains, OK   | 36.5°N    | 97.5°W    | 300–600 m   | April                     | 650              | 371 |
| Southern Great Plains, OK   | 36.5°N    | 97.5°W    | 700–1200 m  | September<br>–<br>October | 457              | 717 |
| Cleveland, OH ; Detroit, MI | 40–42.5°N | 80.5–85°W | 300–1000 m  | August                    | 320–1300         | 332 |
| Central Ontario             | 50°N      | 85°W      | < 2500 m    | October                   | 147<br>(119–173) | 113 |

|                   |        |        |             |         |         |     |
|-------------------|--------|--------|-------------|---------|---------|-----|
| Central Ontario   | 50°N   | 85°W   | 2000–2100 m | Summer  | 350–360 | 121 |
| Central Ontario   | 50°N   | 85°W   | 1300 m      | Winter  | 190     | 84  |
| Upper NY State    | 44°N   | 75°W   | 1500 m      | Autumn  | 240     | 285 |
| State College, PA | 41°N   | 78°W   | 1000–1600 m | October | 388     | 204 |
| Mount Gibbes, NC  | 35.5°N | 82°W   | Surface     | Annual  | 238–754 | 309 |
| Cape Kennedy, FL  | 28.5°N | 80.5°W | 600–2800 m  | August  | 250–330 | 158 |

**Table S4 :** Comparison of estimates for the direct radiative effect ( $RE_{ari}$ ) of total  $NO_3^-$  aerosols from this study and other studies referenced within.

| <b>Reference Study</b> | <b><math>RE_{ari}</math> Estimate (<math>W/m^2</math>)</b> | <b>Time Period</b>                   |
|------------------------|------------------------------------------------------------|--------------------------------------|
| Liao et al., 2004      | -0.14                                                      | Present Day 2000                     |
| Bauer et al., 2007a    | -0.11<br>-0.14                                             | Present Day 2000<br>Present Day 2030 |
| Bauer et al., 2007b    | -0.11                                                      | Present Day 2000                     |
| Bellouin et al., 2011  | -0.12                                                      | Present Day 2000                     |
| Xu and Penner 2012     | -0.12                                                      | Present Day 2000                     |
| Heald et al., 2014     | -0.10                                                      | Present Day 2010                     |
| This Study             | -0.11                                                      | Present Day (2008 - 2018)            |
